# Supplementary material for: Cu-Based mixed metal oxides for an efficient photothermal catalysis of the water-gas shift reaction
Source: Royal Society of Chemistry journal article supplement (doi:10.1039/c9cy00359b), 2019-01-01
Supplement: c9cy00359b1.pdf [file c9cy00359b1.pdf]

## Supporting Information

### **Cu based mix metal oxides for efficient photothermal catalysis of water gas shift reaction**

Fuli Liu,<sup>a</sup> Lizhu Song,<sup>a</sup> Shuxin Ouyang,<sup>a,c</sup> Hua Xu<sup>a,b\*</sup>

<sup>a</sup> School of Materials Science & Engineering, Tianjin University, Tianjin 300072, China

<sup>b</sup> School of Chemistry and Environmental Engineering, Wuhan Institute of Technology, Wuhan 430205, China

<sup>c</sup> College of Chemistry, Central China Normal University, Wuhan 430079, China

\* Author to whom correspondence should be addressed.

Electronic mail: [XU.Hua@wit.edu.cn](mailto:XU.Hua@wit.edu.cn)

**Table S1** Molar mass of the metal precursors used for the prepared catalysts.

| Samples                               | n (mmol)                                             |                                                      |                                                      | H <sub>2</sub> Yield (mmol) |
|---------------------------------------|------------------------------------------------------|------------------------------------------------------|------------------------------------------------------|-----------------------------|
|                                       | Cu(NO <sub>3</sub> ) <sub>2</sub> ·3H <sub>2</sub> O | Zn(NO <sub>3</sub> ) <sub>2</sub> ·6H <sub>2</sub> O | Al(NO <sub>3</sub> ) <sub>3</sub> ·9H <sub>2</sub> O |                             |
| CuAl                                  | 2.70                                                 | 0                                                    | 2.70                                                 | 4.19                        |
| CuZnAl                                | 2.70                                                 | 2.70                                                 | 2.70                                                 | 5.46                        |
| CuZn <sub>2</sub> Al                  | 2.70                                                 | 5.40                                                 | 2.70                                                 | 6.68                        |
| CuZn <sub>3</sub> Al                  | 2.70                                                 | 8.10                                                 | 2.70                                                 | 7.80                        |
| CuZn <sub>4</sub> Al                  | 2.70                                                 | 10.80                                                | 2.70                                                 | 6.42                        |
| CuZn <sub>5</sub> Al                  | 2.70                                                 | 13.50                                                | 2.70                                                 | 4.64                        |
| CuZn <sub>3</sub> Al <sub>0.25</sub>  | 2.70                                                 | 8.10                                                 | 0.68                                                 | 4.97                        |
| CuZn <sub>3</sub> Al <sub>0.5</sub>   | 2.70                                                 | 8.10                                                 | 1.35                                                 | 5.19                        |
| CuZn <sub>3</sub> Al <sub>2</sub>     | 2.70                                                 | 8.10                                                 | 5.40                                                 | 3.69                        |
| CuZn <sub>3</sub> Al <sub>4</sub>     | 2.70                                                 | 8.10                                                 | 10.80                                                | 0.23                        |
| CuZn <sub>0.8</sub> Al <sub>0.2</sub> | 2.70                                                 | 2.16                                                 | 0.54                                                 | 3.32                        |
| CuZn <sub>0.6</sub> Al <sub>0.4</sub> | 2.70                                                 | 1.62                                                 | 1.08                                                 | 8.00                        |
| CuZn <sub>0.5</sub> Al <sub>0.5</sub> | 2.70                                                 | 1.35                                                 | 1.35                                                 | 4.15                        |
| CuZn <sub>0.4</sub> Al <sub>0.6</sub> | 2.70                                                 | 1.08                                                 | 1.62                                                 | 3.74                        |
| CuZn <sub>0.2</sub> Al <sub>0.8</sub> | 2.70                                                 | 0.54                                                 | 2.16                                                 | 3.52                        |
| CuZn                                  | 2.70                                                 | 2.70                                                 | 0                                                    | 9.46                        |

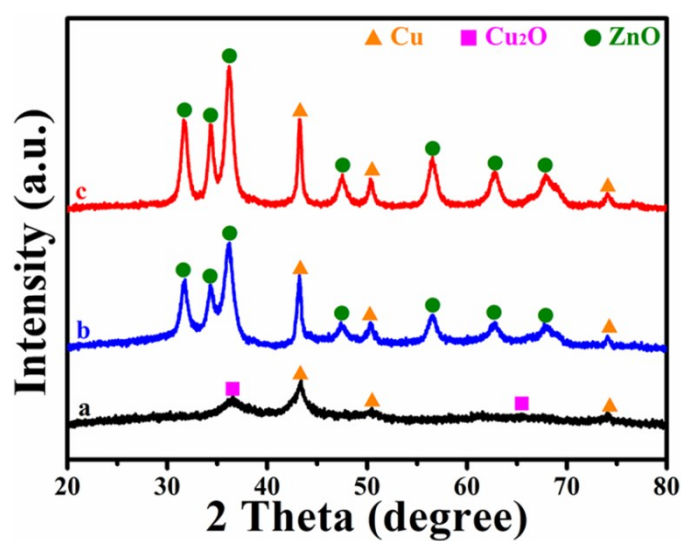**Fig. S1** XRD patterns of the Cu-based catalysts after WGS photothermal reaction. a: CuAl, b: CuZn<sub>0.6</sub>Al<sub>0.4</sub>, and c: CuZn.

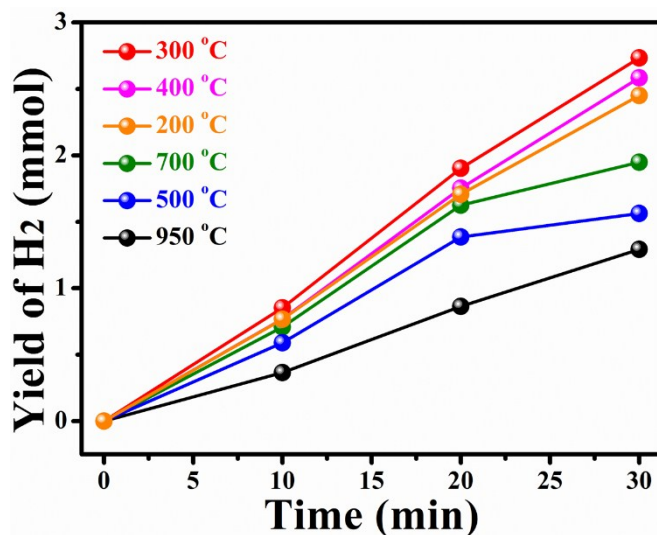

**Fig. S2** Curves of H<sub>2</sub> evolution as a function of CuAl<sub>0.5</sub> catalyst prepared via calcination at various temperature (200-950 °C).

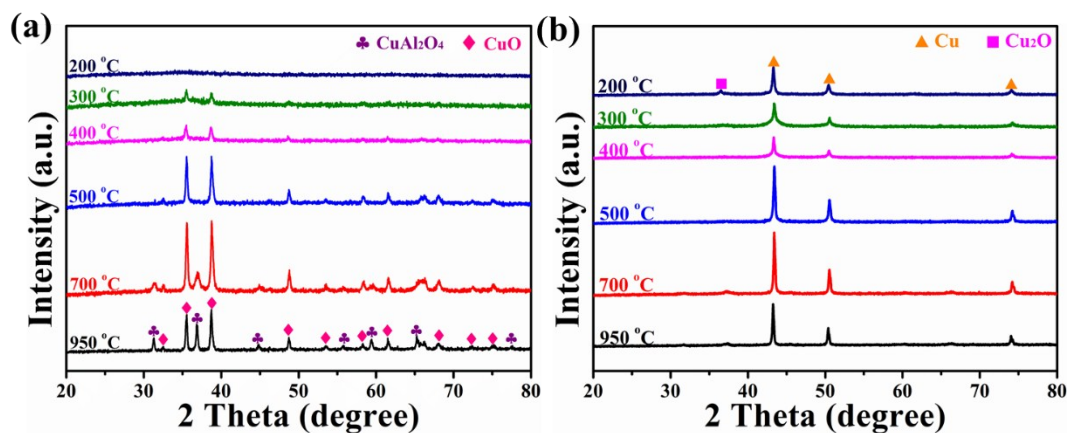

**Fig. S3** XRD patterns of CuAl<sub>0.5</sub> catalyst prepared via calcination at various temperatures, before (a) and after WGS reaction (b).

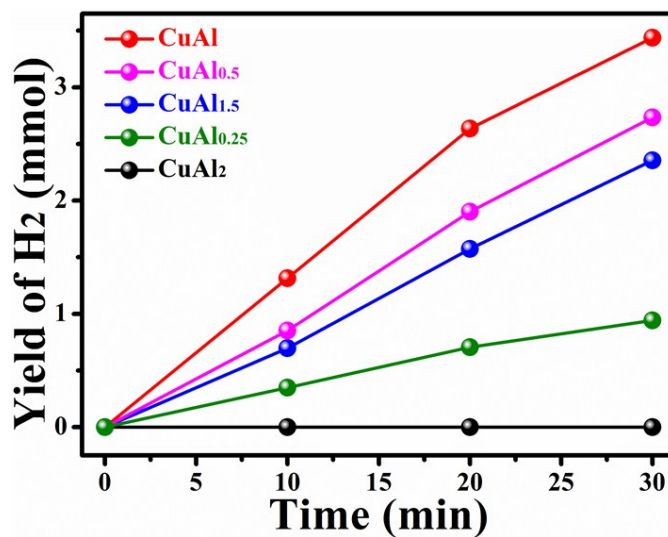

**Fig. S4** Curves of H<sub>2</sub> evolution as a function of CuAl catalyst prepared with a various molar ratio between Cu and Al.

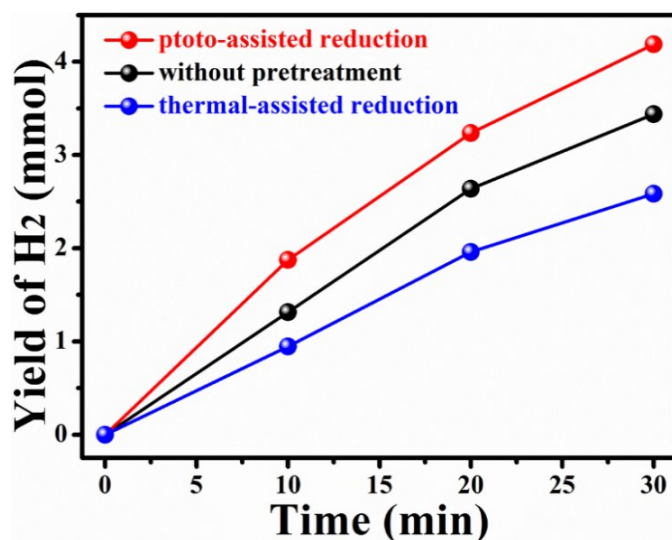

**Fig. S5** Curves of H<sub>2</sub> evolution as a function of CuAl catalyst pretreated via either photo-assisted reduction or thermal-assisted reduction.

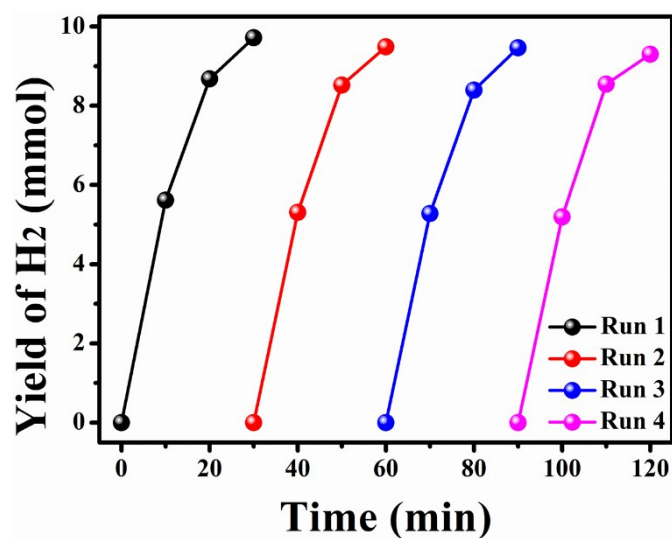

**Fig. S6** Stability test of WGS reaction over the CuZn catalyst (30 min for each cycle).

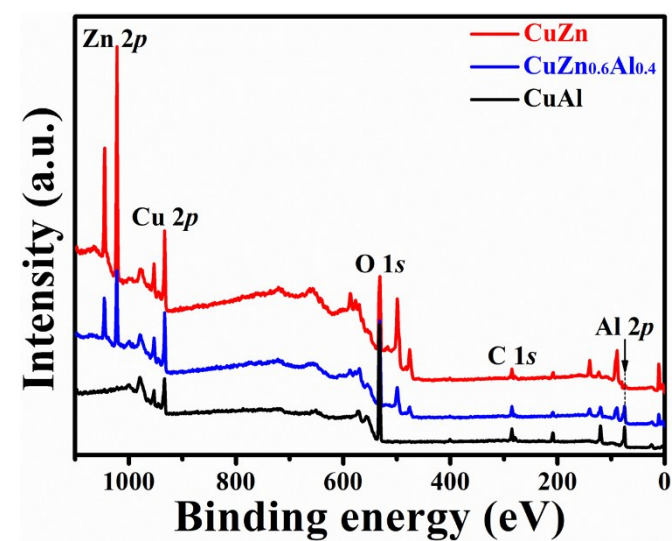

**Fig. S7** Survey XPS spectra of CuAl, CuZn<sub>0.6</sub>Al<sub>0.4</sub> and CuZn catalysts.

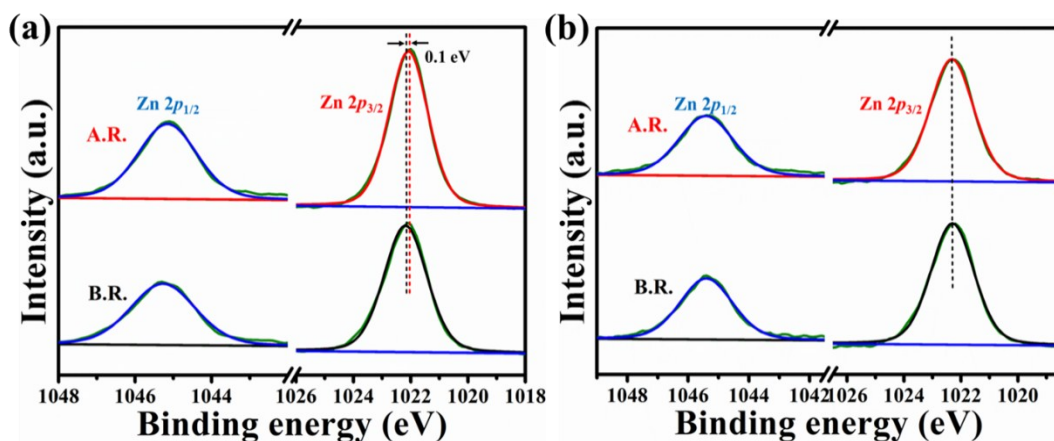

**Fig. S8** Zn 2p XPS spectra of CuZn (a) and CuZn<sub>0.6</sub>Al<sub>0.4</sub> (b) catalysts before and after WGS reaction. (B.R.: before reaction, A.R.: after reaction.)

**Table S2** Binding energy of Zn 2p XPS of CuZn and CuZn<sub>0.6</sub>Al<sub>0.4</sub> catalysts before and after WGS reaction.

|                                       | Zn 2p <sub>3/2</sub> | Zn 2p <sub>3/2</sub> | Zn 2p <sub>1/2</sub> | Zn 2p <sub>1/2</sub> |
|---------------------------------------|----------------------|----------------------|----------------------|----------------------|
|                                       | B.R.                 | A.R.                 | B.R.                 | A.R.                 |
|                                       | (eV)                 | (eV)                 | (eV)                 | (eV)                 |
| CuZn <sub>0.6</sub> Al <sub>0.4</sub> | 1022.3               | 1022.3               | 1045.4               | 1045.4               |
| CuZn                                  | 1022.1               | 1022.0               | 1045.2               | 1045.1               |

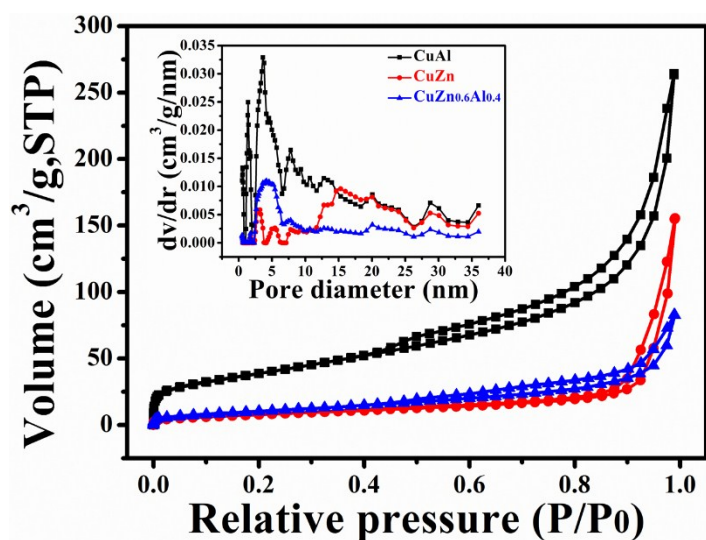

**Fig. S9** Nitrogen adsorption-desorption isotherms and pore-size distribution curves (inset) of CuAl, CuZn<sub>0.6</sub>Al<sub>0.4</sub> and CuZn catalysts.
